1 Unexpected mixed-mode transmission and moderate genetic regulation of  
2 *Symbiodinium* communities in a brooding coral

3

4 Running title: Heritability of *Symbiodinium* in a coral

5

6 Kate M. Quigley<sup>1,2\*</sup>, Patricia A. Warner<sup>1,2</sup>, Line K. Bay<sup>2,3</sup>, Bette L. Willis<sup>1,2</sup>

7

8 <sup>1</sup>ARC Centre of Excellence for Coral Reef Studies, and College of Science  
9 and Engineering, James Cook University, Townsville, QLD 4811, Australia

10 <sup>2</sup>AIMS@JCU, Australian Institute of Marine Science and James Cook  
11 University, Townsville, QLD 4811, Australia

12 <sup>3</sup>Australian Institute of Marine Science, PMB3, Townsville, Queensland  
13 4810, Australia

14

15 \*Corresponding author: KM Quigley

16 Address: Australian Institute of Marine Science, PMB3, Townsville,  
17 Queensland 4810, Australia

18 Email: [katemarie.quigley@my.jcu.edu.au](mailto:katemarie.quigley@my.jcu.edu.au)

19

20

## 21    **Abstract**

22    Determining the extent to which *Symbiodinium* communities in corals are  
 23    inherited versus environmentally-acquired is fundamental to understanding  
 24    coral resilience and to predicting coral responses to stressors like warming  
 25    oceans that disrupt this critical endosymbiosis. We examined the fidelity  
 26    with which *Symbiodinium* communities in the brooding coral *Seriatopora*  
 27    *hystrix* are vertically transmitted and the extent to which communities are  
 28    genetically regulated, by genotyping 60 larvae and their parents (9 maternal  
 29    and 45 paternal colonies) using high throughput sequencing of the ITS-2  
 30    locus. Unexpectedly, *Symbiodinium* communities associated with brooded  
 31    larvae were distinct from those within parent colonies, including the  
 32    presence of types not detected in adults. Bayesian heritability ( $h^2$ ) analysis  
 33    revealed that 33% of variability in larval *Symbiodinium* communities was  
 34    genetically controlled. Results highlight flexibility in the establishment of  
 35    larval communities and overturn the paradigm that symbiont transmission is  
 36    exclusively vertical in brooding corals. Instead, we show that *Symbiodinium*  
 37    transmission in *S. hystrix* involves a mixed-mode strategy, similar to many  
 38    terrestrial invertebrate symbioses. Also, variation in the abundances of  
 39    common *Symbiodinium* types among adult communities suggests that  
 40    microhabitat differences influence the structure of *in hospite Symbiodinium*  
 41    communities. Partial genetic regulation coupled with flexibility in the  
 42    environmentally-acquired component of larval *Symbiodinium* communities  
 43    implies that corals with vertical transmission, like *S. hystrix*, may be more  
 44    resilient to environmental change than previously thought.

45

46

## 47 **Introduction**

48 Symbiosis is fundamental to life on Earth, underpinning the existence of  
 49 numerous prokaryotic and eukaryotic species and shaping the physiology  
 50 and health of many organisms [1–3]. Microbial symbionts also enable hosts  
 51 to expand their niche breadth to survive in environments otherwise unsuited  
 52 to their physiology [4]. For example, symbiosis with photosynthetic  
 53 dinoflagellates of the genus *Symbiodinium* has allowed corals to thrive in  
 54 oligotrophic tropical seas through the utilization of symbiont  
 55 photosynthates. Similar nutritional facilitation has been described for sap-  
 56 sucking insects that rely on microbial partners to supplement their diets [5]  
 57 and legumes that rely on rhizobia to fix nitrogen [6]. Unlike these well-  
 58 characterized systems, coral endosymbioses are poorly described at the  
 59 *Symbiodinium* type level during early ontogeny.

60

61 Nutritional symbioses can drive diversification of host and symbiont  
 62 lineages [7–9], with eukaryotic symbionts like *Symbiodinium* having gone  
 63 through multiple cycles of diversification and expansion [10]. Such sources  
 64 of genetic variation provide new material upon which selection may operate  
 65 [11,12], facilitating coevolution between hosts and symbionts or among  
 66 symbionts [3,11,13]. Understanding the fidelity (exactness of transfer of  
 67 symbionts from parent to offspring) of *Symbiodinium* community  
 68 inheritance is key to determining the degree to which endosymbiotic  
 69 *Symbiodinium* communities have coevolved with their coral hosts and is

70 central to coral nutrition and health. Despite this, little is known about  
71 genetic regulation underpinning this symbiosis.

72

73 Symbionts may be acquired from the environment (horizontal transmission)  
74 or passed maternally into eggs or larvae (vertical transmission), with the  
75 latter thought to be the most prevalent mode of transmission in brooding  
76 scleractinian corals [14]. Maternally-derived symbionts may involve the  
77 transmission of one or multiple symbionts (superinfections) and, at least in  
78 well-studied insect vertical symbioses, may strongly impact host  
79 reproduction, behaviour and co-evolution [12,15]. Transmission of insect  
80 symbionts may be exclusively vertical or may occur initially as vertical  
81 transfer followed later by horizontal transmission [9,15–19]. Although  
82 similar mixed-mode transmission has been hypothesized for corals [20], the  
83 absence of experimental data means that it is not yet clear if transmission is  
84 exclusively vertical in brooding corals or if mixed-mode transmission also  
85 occurs in this group. Given recent evidence of differences in the diversity of  
86 symbiont communities transmitted from parents to offspring in two  
87 broadcast spawning corals [21,22], *Symbiodinium* transmission dynamics  
88 may be as complex as those observed in the Arthropoda.

89

90 In general, symbiont-host specificity is theorized to be much greater when  
91 symbionts are transmitted vertically compared to horizontally [23,24]. In  
92 corals, hosts may form strict associations with only one *Symbiodinium* type  
93 (and *vice versa*) or associate with multiple partners, but in general,

94 superinfections of multiple *Symbiodinium* types and subtypes of varying  
 95 abundances are common [20,25–29]. Although maternal transfer of  
 96 *Symbiodinium* and bacteria is less well-characterized in corals than in  
 97 terrestrial invertebrates [20–22,30,31], the presence of superinfections raises  
 98 the possibility that *Symbiodinium* dynamics are similar to the mixed-mode  
 99 transmission dynamics characteristic of superinfections described in  
 100 terrestrial invertebrates like aphids and sharpshooter cicada [9,11].  
 101 However, unlike studies of insect symbiont specificity, no studies have used  
 102 high throughput sequencing to examine maternally-transmitted  
 103 *Symbiodinium* communities in brooding corals or the diversity of low  
 104 abundance *Symbiodinium* types in detail. Similarly, the genetic component  
 105 of parental contributions to the maturation of coral-*Symbiodinium*  
 106 symbioses remains unquantified.

108 It is clear that different *Symbiodinium* types vary in their impact on  
 109 holobiont physiology because of variation in their stress tolerance and  
 110 ability to produce and transfer photosynthates to the coral host under  
 111 differing light, temperature and nutrient regimes [28,32–36]. Moreover,  
 112 environmental stressors may bring about shifts in the dominance of different  
 113 *Symbiodinium* types, in some cases benefiting the host under the altered  
 114 conditions [37,38]. The extent of a coral's flexibility to acquire resilient  
 115 types or shuffle symbionts may be genetically regulated, for example by  
 116 heritable host immune responses, similar to those that shape symbiont  
 117 diversity in *Drosophila* [39]. Complete inheritance results in complete

118 fidelity of symbiont transmission, and, hence, little scope for flexibility in  
119 coral-*Symbiodinium* symbioses. However, the extent of such potential  
120 regulation of symbiont transmission and its underlying basis are unknown  
121 for corals.

122

123 Increasingly, studies are revealing that the genetic architecture behind traits  
124 and pathologies can be complex [40]. For example, both the diversity and  
125 abundance of microbial symbionts in the human gut are complex traits  
126 under partial genetic control [41–46]. Narrow-sense heritability ( $h^2$ ) is the  
127 parameter typically used to describe the degree to which variability in a trait  
128 is explained by genetic factors. Assuming that the *Symbiodinium*  
129 community associated with a coral can be represented as a complex trait,  
130 then an  $h^2$  value of 1 would imply that variability of the community is  
131 mostly due to host genetics. Conversely, an  $h^2$  value estimated at 0 would  
132 imply no genetic basis for variability in the community, thus the community  
133 would not be under selection and could not evolve [no evolvability; 47].

134 Although an  $h^2$  estimate close to 1 does not necessarily guarantee absolute  
135 genetic determination as a result of gene segregation [48], a large  
136 heritability estimate of the *Symbiodinium* community would imply that  
137 changes in host genotypes are required for shifts in symbiont communities.  
138 Conversely, changes in the environmental availability of *Symbiodinium* or  
139 in environmental conditions would have limited influence on *in hospite*  
140 communities. Understanding the relative contributions that host genetics  
141 versus environmental conditions make to the composition of *Symbiodinium*

142 communities through estimations of  $h^2$  will improve the accuracy with  
143 which the potential, direction and speed of changes in *Symbiodinium*  
144 communities can be predicted.

145

146 To examine *Symbiodinium* community transfer between adults and their  
147 offspring in a brooding coral and quantify the narrow-sense heritability ( $h^2$ )  
148 of this trait, we quantified the *in hospite* *Symbiodinium* communities of  
149 individual planula larvae and their parents across a spectrum of relatedness  
150 using high throughput sequencing. Relatedness was based on a population  
151 genetic parentage analysis that assigned the likely paternal identity of each  
152 larva. In light of results on heritability and fidelity of symbiont transfer, we  
153 discuss the potential of larvae from brooding corals like *S. hystrix* to  
154 acclimate to novel environments.

155

## 156 **Results**

157

158 *Symbiodinium* communities differ between parents and brooded larvae

159

160 *Symbiodinium* communities differed between adults and their larvae in the  
161 brooding coral *Seriatopora hystrix* (ShA) (Figure 1A, B). Overall, the  
162 composition of *Symbiodinium* communities was similar among adult corals,  
163 but more variable among larvae. On average, adults contained  $29.9 \pm 0.6$  (SE)  
164 OTUs and larvae had  $22 \pm 0.4$  OTUs. However, the number of unique OTUs  
165 recovered was more than five times greater from larvae than from adults (93

vs. 17 OTUs, respectively; Figure 1C). Of the 17 unique adult OTUs, ten belonged to clade C (C1, C15 and other variants), three from clade A (A1 and variants), three from D (including D1 and D1a), and one was a putative C type (Figure 1B, sequences most highly similar to mixed *S. hystrix*/*Symbiodinium* libraries– see Supporting Information). Unique to larvae were 17 OTUs from clade C (likely C1 variants), four from clade E, one from each of A3, B1, and G6, and 69 that were of putative *Symbiodinium* identity (Figure 1B). Of the 93 larval-specific OTUs, only the abundance of C1\_OTU136 (type followed by OTU designation) and two putative clade D OTUs (OTU148 and OTU149) were significantly different from zero with the Benjamini-Hochberg correction (Figure 1B). Although raw read counts were low, C1\_OTU136 was present in larvae from every dam but dam 3.

**Figure 1.** Nonmetric multidimensional scaling (NMDS) plots, based on a Bray-Curtis distance matrix of variance-normalized OTU abundances and sequence similarity between OTUs (pairwise percent identities), illustrating differences between *Symbiodinium* communities associated with adult colonies and larvae of the brooding coral *Seriatopora hystrix* (ShA). Ellipses encircling symbols of the corresponding colour represent 95% probability regions for adults (black) and larval broods (coloured), where each brood represents all larvae sharing the same dam (colour-coded). A) Each point represents the *Symbiodinium* community associated with a unique coral adult or larval sample. B) Each point represents an OTU



190 coloured by type level (see Supporting Information table S5 for full names).  
 191 Outlining around each point represents the origin of the OTU, i.e., those  
 192 found uniquely in adult (grey outline) or larval (broken grey outline)  
 193 samples, or retrieved from both (black outline). Samples presented in (A)  
 194 and OTUs presented in (B) share the same ordination space but were  
 195 separated for clarity. C) Venn diagram, illustrating the number of  
 196 *Symbiodinium* OTU's that were unique to larvae (dark grey text) versus  
 197 adults (light grey text). The number of OTUs that were significant after p-  
 198 adjustments are in parentheses. Ellipses corresponding to dams 3 and 10 are  
 199 not represented, as only one larva per dam was collected and sequenced.  
 200  
 201 Fifty-one OTUs were shared by adult colonies and planula larvae (43 of  
 202 known *Symbiodinium* taxonomy, 8 putative *Symbiodinium*, Figure 2B), and  
 203 the abundances of 28 of these OTUs differed significantly between the two  
 204 groups at the adjusted p-level (Table S4, Supporting Information). Of these  
 205 28 OTUs, 23 were from clade C (including C1, C3w, C120 amongst others),  
 206 three from clade D (D1, D1a), and two from clade A (A1, A3). Adult  
 207 *Symbiodinium* communities were characterised by up to 1.3 times more D-  
 208 types (D1\_OTU3, D1\_OTU597, D1a\_OTU6), and A-types (A1\_OTU10  
 209 and A3\_OTU8) compared to larvae (Benjamini-Hochberg corrections, Table  
 210 S4). Nine of the 23 C-types had up to 1.7 times significantly higher  
 211 abundances in adults (including multiple C1 types, C120/C120a\_OTU1,  
 212 C1m\_OTU5/105, C1v6/C22\_OTU228, C15\_OTU46, C31\_OTU733, and

213 C3W\_OTU165) and the remaining C1 types had between 1.5 – 2.4 times  
214 significantly lower abundances in adults (Table S4).

215

216 **Figure 2.** A) Log<sub>2</sub> fold change in abundances of *Symbiodinium* OTU's that  
217 differed significantly between communities associated with adults versus  
218 larvae of *Seriatopora hystrix* (ShA). Grey-scale in the bar plot identify  
219 *Symbiodinium* clades. A positive change indicates the OTU is more  
220 abundant in adults. B) Boxplots showing medians, quartiles and  
221 minimum/maximum values of *Symbiodinium* community diversity (Leinster  
222 and Cobbold metric) in relation to individual larval relatedness. On the x-  
223 axis, 0.25 denotes half sibs, 0.5 full sibs, and 1.0 denotes larvae produced  
224 from selfing. Each larva is coloured by its respective dam. C) Network  
225 analysis of planula larvae showing OTUs present in 50% or more of larvae  
226 per brood. White diamonds correspond to maternal broods, where each  
227 brood sharing the same dam is colour-coded. Line thickness denotes relative  
228 abundance of the *Symbiodinium* type per brood.

229

### 230 *Larval Symbiodinium communities vary among broods*

231 Planula larvae that shared the same maternal parent generally clustered  
232 when *Symbiodinium* OTU richness, abundance, and DNA distance between  
233 OTUs were incorporated into analyses (Figure 1A, B). Thirty-one OTUs  
234 (including multiple C1 variants, D1, D1a, A1, and A3) were found in  
235 greater than 50% of larvae per brood and were generally present across all  
236 broods (Figure 2C). However, differences in the abundance of OTUs

amongst larval broods were detected for symbiont types A1, A3, C1, D1, and D1a, amongst others. Briefly, larvae from dam 2 displayed higher abundances of A1 and A3. Larvae from dams 3, 7 and 10 had significantly less of C1\_OTU2, whilst broods from dams 4, 6, 13, 14, and 18 had significantly different abundances of many C-types, including C120/C120a, C1, C1v1e, C1m, and C31. The abundances of D1\_OTU3 and D1a\_OTU6 also varied significantly among larval broods, particularly among those from dams 2, 4, and 18 vs. dam 13 (for a full description see Supporting Information and Table S4).

#### Heritability

Leinster and Cobbold estimates of *Symbiodinium* community diversity varied across the 60 larvae. Notably, variance around median estimates decreased as relatedness between individual larvae increased (Figure 2B). The posterior mean heritability of the *Symbiodinium* community in *S. hystrix* (ShA) larvae was  $0.43 \pm 0.21$  SD, with a posterior mode of 0.33 (95% Bayesian credibility interval (BCI) 0.1 - 0.8; Figure S2, Supporting Information). Adding maternal identity as a random effect did not improve the model (Deviance Information Criterion < 2 units) but decreased the posterior mean and mode of heritability slightly (mean =  $0.37 \pm 0.21$  SD and mode = 0.19; BCI: 0.1 - 0.8).

#### Patterns in adult *Symbiodinium* communities with colony size and spatial distribution

261 Of the 68 *Symbiodinium* OTUs found in adults, the abundance of only four  
 262 C-type OTUs differed significantly among the five coral size classes. Two  
 263 C-types (OTU228 and OTU105) had two times greater abundances in the 26  
 264 – 32 cm class compared to corals in each of the other four size classes (all  
 265  $p$ 's > 0.05; Table S4). Similarly, C31\_OTU733 was found at significantly  
 266 lower abundance in corals from the 8 – 14 cm class compared to the single  
 267 colony in the largest size class ( $p$  > 0.05; Table S4). Colonies from the 8 – 14  
 268 cm class also had 1.7 times lower abundances of C1\_OTU4 compared to  
 269 corals in the 14 – 20 cm class ( $p$  > 0.05; Table S4).

270

271 The distributions of three of the ten most abundant OTUs in adult corals  
 272 varied significantly across the sampling area ( $p$  > 0.05; Figure 3), although  
 273 not in a consistent manner with distance either along or down the sampling  
 274 area. For example, although abundances of *Symbiodinium* C120/C120a were  
 275 greatest in the lower left of the sampling area (Gradient Boosted Model  
 276 (GBM):  $p$  = 0.019), consistent with a gradual increase in distance down the  
 277 reef slope, this pattern was not consistent along the reef slope (GBM:  $p$  =  
 278 0.00841). The abundance of D1 was significantly higher in the top-right and  
 279 lower left side of the sampling area than in other aspects (x and y  
 280 interaction, GBM:  $p$  = 0.0393). D1a was least abundant in the top left and  
 281 inner portion of the sampling area (GBM:  $p$  = 0.0405). Finally, although the  
 282 variance normalized abundances of all three OTUs were significantly  
 283 positively correlated overall (Spearman's rank correlation rho: 0.42 – 0.77,  
 284 all  $p$  < 0.004), extremely low abundances of C120/C120a at x-coordinates

285 >15 contrast markedly with high abundances of the two D-types in the same  
286 region (Figure 3).

287

288 **Figure 3.** Spatial patterns in the normalised abundance of three  
289 *Symbiodinium* OTU's associated with adult colonies of *Seriatopora hystrix*  
290 (ShA) that differed significantly in their abundances across a portion of the  
291 16 m x 40 m sampling area at Lizard Island: A) C120/C120a, B) D1, and  
292 C) D1a. Grey scale represents changes in the normalized abundance of each  
293 OTU across sampling site coordinates. Sizes of the black circles represent  
294 size classes of coral colonies in cm (drawn to scale).

295

## 296 Discussion

297 *Mixed mode transmission structures larval Symbiodinium communities in a*  
298 *brooding coral*

299 The availability of a full larval pedigree for *Seriatopora hystrix*  
300 (ShA) [49] provided a unique opportunity to evaluate the relative  
301 contributions of heritability (i.e., the degree to which variability in a trait is  
302 explained by genetic factors) versus maternal environmental effects (the  
303 effect of larvae sharing a common maternal environment) to the  
304 composition of larval *Symbiodinium* communities in a brooding coral. Here  
305 we show that *Symbiodinium* communities associated with larvae of *S.*  
306 *hystrix* (ShA) differ from those associated with their parents, providing  
307 experimental evidence that at least a portion of the *Symbiodinium*  
308 community is horizontally transmitted in a brooding coral. Such paradigm-

309 changing knowledge on symbiont transmission is important as it realigns the  
310 cnidarian literature with well-characterized models of invertebrate  
311 symbioses. Overall, *Symbiodinium* communities were found to be  
312 moderately heritable, with only 33% of variability in larval symbiont  
313 communities under genetic regulation. Model selection also showed that  
314 maternal environmental effects did not significantly explain variability in  
315 *Symbiodinium* communities found among larvae. This result, combined with  
316 the moderate heritability estimate, indicates that similarities in  
317 *Symbiodinium* communities among larvae of the same maternal brood were  
318 due to gene(s) inherited by these larvae.

319

320 Heritability estimates reveal important information about the  
321 evolvability of a trait, such as the capacity of brooding corals to vary their  
322 symbiont communities in response to changing environmental conditions. If  
323 levels of heritability and genetic variance are low, then responses to natural  
324 or artificial selection (evolvability) would be limited [48]. Conversely, high  
325 heritability and high genetic variance of a trait would enable greater  
326 responses to selection pressures. On the other hand, highly heritable  
327 symbiont communities with low genotypic variation could be problematic  
328 for vertically-transmitting coral populations if adult communities are  
329 thermally sensitive [50]. We found moderate heritability of *Symbiodinium*  
330 communities in *S. hystrix* (ShA). Much greater heritability of the  
331 *Symbiodinium* community was expected in this vertically-transmitting coral,  
332 especially in comparison with what is known of other important

333 reproductive and fitness traits. For example, fertilization success, larval heat  
 334 tolerance, protein content, settlement success, settlement substrate  
 335 preferences, and juvenile growth and survivorship are all heritable traits  
 336 [51–55]. Although the distribution of posteriors was skewed towards values  
 337 greater than that of our heritability estimate, it is unlikely that heritability  
 338 (i.e., genetic regulation) for this trait will resolve to be much greater with  
 339 increased sampling effort (~0.5-0.6, Figure S2). The moderate levels of  
 340 genetic regulation (i.e., heritability) found here suggest that *S. hystrix* (ShA)  
 341 has some capacity to respond to changing environmental conditions. Thus,  
 342 intervention efforts to facilitate such phenotypic change may be possible  
 343 [48]. Given that assisted evolution efforts involving heat-selected  
 344 *Symbiodinium* types show promise in horizontally-transmitting corals [56,  
 345 but see 57], it may be that vertically-transmitting, brooding species with  
 346 moderate fidelity like *S. hystrix* (ShA) could also be candidates for assisted  
 347 *Symbiodinium* uptake.

348  
 349 *Combined maternal and environmental uptake produces locally adapted but*  
 350 *flexible Symbiodinium communities*

351  
 352 Detection of 93 larval-specific OTUs in this study demonstrates that  
 353 brooding corals like *S. hystrix* (ShA) have a mixed-mode transmission  
 354 strategy, in which dominant symbionts are transmitted vertically but  
 355 additional background strains are acquired from environmental sources.  
 356 Although adult diversity may have been under-sampled by only sequencing

one branch of each parental colony, unique larval OTUs were not detected in any of the 45 adult colonies that were genotyped. Environmental uptake of novel *Symbiodinium* by larvae of this species is further supported by the appreciable amount of variation in the composition of larval *Symbiodinium* communities that was not under genetic control, according to our heritability model. These results validate the hypothesis of potential mixed-mode transmission initially raised by Byler et al. [20]. However, although juveniles hosted multiple symbionts in their study, they did not find differences in diversity between *S. pistillata* adults and larvae [20]. Evidence of mixed-mode transmission in *S. hystrix* (ShA) contradicts previous assumptions that maternally-transmitted symbiont communities are transferred to offspring with high fidelity in corals [23–25]. Our findings are consistent with transmission patterns documented in other symbiotic systems, such as wild *Drosophila hydei* populations [9], *Acromyrmex* ants [15,16], and paramecium [17,18], and aligns symbiotic transmission ecology in corals with terrestrial invertebrate symbioses. Additionally, the novel diversity found in *S. hystrix* (ShA) larvae mirrors increased diversity of *Symbiodinium* communities detected in eggs of *Montipora capitata* and *M. digitata* compared to adults [21,22] and of bacterial communities in larvae of the brooding coral *Porites astreoides*, as well as of various bacterial communities associated with larvae of sponge species with supposed vertical transmission [31,58].

379



380 Mounting evidence for mixed-mode transmission across phyla  
 381 suggests that it may be evolutionarily advantageous to compromise between  
 382 completely vertically- and horizontally-acquired symbiont communities, as  
 383 both strategies provide distinct advantages and disadvantages [14,20]. In *S.*  
 384 *hystrix* (ShA), vertical transmission of *Symbiodinium* that are locally  
 385 adapted to the parental environment is likely to provide benefits for a  
 386 species that is able to self-fertilize [49,59] and has highly localised larval  
 387 dispersal (e.g., 60–62]. However, a locally adapted community might  
 388 become a liability if environmental conditions change or if larval dispersal  
 389 distances are long. Negative effects include deregulation or disruption of  
 390 symbiont abundances, which may have harmful physiological effects on the  
 391 host, like bleaching in corals [38] or wasp parasitism in insects [9,63]. Thus,  
 392 a mixed-mode strategy that results in superinfections of multiple symbionts  
 393 can be beneficial [e.g., parasitoid protection in aphid hosts, 9,19] and may  
 394 provide more flexibility for adjusting to variable environmental conditions.  
 395 Similarly, a mixed mating strategy of selfing and outcrossing in *S. hystrix*  
 396 (ShA), combined with a functional nutritional symbiosis upon release, may  
 397 facilitate both local and long-distance dispersal [49]. Our findings confirm  
 398 that diversity and flexibility in *Symbiodinium* transmission are greater than  
 399 previously thought, highlighting the potential for evolvability that may  
 400 confer greater resilience than coral species with strict vertical transmission.

401

402 Additional to environmental uptake of *Symbiodinium* during early  
 403 ontogeny, processes like competitive exclusion may contribute to

404 differences between larval and adult communities in *S. hystrix* (ShA).  
 405 Theory suggests that competition among symbionts may preclude  
 406 transmission of an exact replica of the parental symbiont community  
 407 because conditions promoting growth for some symbionts may differ  
 408 between life stages [11]. The novel symbiont diversity found in *S. hystrix*  
 409 (ShA) larvae may provide benefits similar to those observed in insect  
 410 symbioses, for example to provide larvae with the flexibility to host optimal  
 411 symbiont types for the changing conditions through ontogeny [20,27]. For  
 412 example, *Symbiodinium* C1\_OTU136, which was uniquely identified in  
 413 larvae, may represent an adaptive advantage for this early life stage. Clade  
 414 C types are taxonomically and physiologically diverse [10,64], and exhibit a  
 415 range of tolerances for light and temperature, which are also reflected in  
 416 their *in hospite* distributions across individual adult colonies and species  
 417 [65]. Larval settlement and early juvenile survival are generally highest in  
 418 cryptic, low-light areas that offer protection from predation [66,67]. Given  
 419 that optimal settlement environments differ substantially from light  
 420 environments experienced by adults, potentially by as much as 10-fold [67],  
 421 it is possible that variation in *Symbiodinium* communities between larvae  
 422 and adults observed here relates to different selective pressures associated  
 423 with differing light environments [68–70]. Other potentially numerous,  
 424 uncharacterized differences between larval and adult microhabitats may also  
 425 contribute to differences in selective pressures between life stages. The  
 426 potential ecological roles for the larval-specific OTUs recorded here are  
 427 unknown. Indeed, it is possible that they represent non-symbiotic, free-

428 living types [71] that may have attached to the exterior of the larvae  
 429 following release or that may have entered brooded larvae without engaging  
 430 in symbiosis. Further work is needed to determine how many of these OTUs  
 431 represent physiologically important versus transient *Symbiodinium*.

432

#### 433 *Potential mechanisms shaping larval Symbiodinium communities*

434

435 The immune system is an obvious mechanism by which the host  
 436 could exert control over the symbiotic community by regulating the  
 437 establishment of individual *Symbiodinium* types [72] or of either whole  
 438 clades or functional units (i.e., clades or types with similar metabolic roles)  
 439 [44]. The symbioses of *Wolbachia* and *Spiroplasma* bacteria among  
 440 *Drosophila* and lepidopteran genera, for example, are highly specific and  
 441 exclude other bacterial lineages through a dynamic and mature immune  
 442 response, to the extent that specific *Drosophila* species host novel and  
 443 specific *Wolbachia* and/or *Spiroplasma* strains [12,39]. Mechanisms of  
 444 immunity that could be transmitted through inheritance of parental genes  
 445 include components of both the innate and adaptive immune response,  
 446 including some that have been implicated in shaping invertebrate symbiont  
 447 communities, such as T-cells, Nod2, defensins, and antimicrobial peptides  
 448 [as reviewed in 73,74]. These mechanisms have been documented during  
 449 *Symbiodinium* establishment in corals [72,75,76] and observed in the  
 450 *Hydra*/bacteria symbiosis [73,77].

451

452           Conversely, the greater variation and diversity found in larval  
453 compared to adult *Symbiodinium* communities may be a function of an  
454 immature immune response that is not yet able to differentiate appropriate  
455 *Symbiodinium* types, rather than an adaptive response. As the coral immune  
456 system matures over time [78,79], it is possible that a winnowing process  
457 eliminates symbionts that are not physiologically beneficial to the coral host  
458 [20,27]. If true, then the ubiquitous presence of *Symbiodinium* C1\_OTU136  
459 in larvae may be a consequence of an opportunistic *Symbiodinium* type  
460 taking advantage of immature host immunity. Further work is needed to  
461 identify the role that the immune response has in shaping *Symbiodinium*  
462 communities; in particular what (if any) immune-related genes are being  
463 transmitted from parents to offspring and whether novel symbionts are a  
464 function of an under-developed immune response.

465  
466 *Winnowing and microhabitat variation may shape adult Symbiodinium*  
467 *communities*

468  
469           The disparate *Symbiodinium* communities in larvae versus adults  
470 found here further indicate that the re-shaping of the *Symbiodinium*  
471 community through ontogeny is an important developmental process in  
472 corals. Ontogenetic variability in microbial communities (both  
473 *Symbiodinium* and bacteria) is common in both vertically- and horizontally-  
474 transmitting cnidarian species [20,21,26,27,29–31,80–84]. The low level of  
475 variation in *Symbiodinium* communities associated with corals ranging in

diameter from 8 cm to >30 cm [3-10 years; 85] suggests that the end of the winnowing process likely occurs earlier in the development of the brooding coral *S. hystrix* (ShA)(i.e., before 3 years) than in broadcast-spawning corals [~3.5 years; 26,27]. Although evidence for switching of symbiont communities in adults corals exists [86], the pre-winnowing period may be the most flexible time for hosts to associate with a diversity of microbes. Therefore, identifying at what stage winnowing occurs in brooding corals will provide crucial insights into when the flexibility to associate with environmentally-acquired and potentially stress-tolerant types diminishes and specialisation of the *Symbiodinium* community begins.

Spatial patterns in the abundances of *Symbiodinium* C120, D1, and D1a in adult corals were not consistent along or down the reef slope at Lizard Island, but may reflect variable temperature and light regimes at the microhabitat level that interact with differing photo-physiologies among symbiont types [87,88]. Variation in benthic light regimes at cm-level scales down the vertical faces of individual colonies and variation in irradiance within coral tissues have been shown to drive symbiont communities in other coral species [69,70,89,90]. Thus differences at the meter-level scales found in this study could be important for structuring *in hospite* *Symbiodinium* diversity, and may be partly responsible for the variability found at the level of individual larvae and broods. These small scale differences in symbiont abundances within adults may subsequently influence variability in *Symbiodinium* types among larvae. However, further

work is needed to understand how fine-scale environmental variables impact *Symbiodinium* presence and abundance at the type and OTU level in this species.

## Conclusion

Based on novel heritability and paternity analyses, we show that *Symbiodinium* communities associated with the brooding coral *S. hystrix* (ShA) are only partially genetically regulated by their host and that larvae retain the flexibility to associate with novel symbionts across generations. Unexpectedly, our results reveal a mixed-mode transmission strategy for establishing *Symbiodinium* communities in larvae of a brooding coral, based on demonstrations that novel and unique *Symbiodinium* types are found in brooded larvae but not in adults. Importantly, this information aligns symbiosis transmission ecology in corals with well-known terrestrial invertebrate symbioses that typically exhibit mixed-mode transmission strategies. Advances in the understanding of heritable genetic mechanisms quantified here provide important insights into how *Symbiodinium* communities may be targeted for intervention strategies to increase reef resilience.

## Materials and Methods

### *Study species and sampling design*

The common, hermaphroditic coral *Seriatopora hystrix* broods sexually-produced larvae following internal fertilization of eggs by sperm from

surrounding colonies [49,91]. DNA extracts of planula larvae for the present study were selected from samples that were collected in an earlier study to assess sperm dispersal distances and larval parentage of a cryptic species within the *S. hystrix* species complex, specified as *S. hystrix* (ShA) [49,92]. In Warner et al.'s study, colonies were tagged and sampled for molecular analyses within a 16 m x 16 m sampling area, with additional colonies sampled from two adjacent transects (totalling 16 m x 40 m area) in the Lizard Island lagoon [S14°41.248, E145°26.606; 49,92]. Microsatellite genotypes and paternity assigned to individual larvae in this earlier study [49] enabled us to examine the effect of both maternal and paternal identity on larval *Symbiodinium* communities across a full pedigree of larval relatedness. Hence, our study included full-sib and half-sib larvae, and four individuals produced by selfing (further details in Supporting information and Table S1).

538

#### 539 *Symbiodinium* community genotyping

*Symbiodinium* communities of adults and larvae were quantified with amplicon sequencing of the ITS-2 locus using the same DNA extractions that had been used to assign microsatellite genotypes and paternity in Warner et al. (2016). Nine maternal and 45 assigned paternal colonies (which included the nine maternal colonies), plus all larvae whose paternity was designated with a confidence level of Very High, High, or Medium by Warner et al. (2016) (n=60 larvae) were sequenced with the primers ITS2alg-F and ITS2alg-R [93] using paired-end Illumina Miseq technology.

548 Library preparation and sequencing were performed at the University of  
549 Texas at Austin's Genomics Sequencing and Analysis Facility (USA) using  
550 their standard protocols, including Bioanalyzer (Agilent)-based DNA  
551 standardization and pooled triplicate PCR before library preparation.

552

553 Raw reads (total = 6,875,177) were analysed using the USEARCH and  
554 UPARSE pipelines [v.7; 94], as outlined in Quigley et al. [95; further details  
555 in Supporting Information]. Because there is currently no single copy  
556 marker for *Symbiodinium* genotyping [96], the ITS-2 marker was selected  
557 for the broadest comparisons to the vast literature that has used this marker  
558 to describe *Symbiodinium* diversity, including some using next generation  
559 sequencing (e.g., [22,95,97–100]). Additional steps were taken to assess the  
560 presence and impact of intragenomic variants (further explained below).  
561 Briefly, reads were filtered, clustered into OTUs at 97% similarity,  
562 annotated with NCBI nt database and *Symbiodinium*-specific searches  
563 (further details in Supporting Information Table S2). Using these methods,  
564 the majority of the OTUs were re-assigned to a clade/type level, leaving  
565 only 0.03% of cleaned reads (1459 reads, 78 OTUs) that could not be  
566 classified, and which may represent new *Symbiodinium* types (Table S3,  
567 Figure S1, Supporting Information).

568

569 To account for variable read-depth across all samples, sample reads were  
570 normalized using 'DESeq2' and 'Phyloseq' implemented in R [101–103].  
571 Nonmetric multidimensional scaling (NMDS) was performed and plotted



572 using the normalized counts matrix using ‘Phyloseq’, ‘vegan’, and ‘ggplot’  
573 [104,105]. Genetic distances between OTUs were calculated in ‘Ape’ [106].  
574 Statistical testing of variation in OTU abundance was performed on raw  
575 reads in ‘DESeq2’, which incorporates variance normalization of OTU  
576 abundance, and interpreted using the Benjamini-Hochberg correction for  
577 multiple-inferences of p-adjusted alpha at 0.05. ‘DESeq2’ outputs are  
578 expressed in multiplicative (log2 fold) terms between or among treatments  
579 [107]. Network analysis on planula larvae was performed using the ‘igraph’  
580 package [108] and custom scripts from [109].

581

#### 582 *Estimating the diversity and heritability of Symbiodinium communities*

583 To describe the *Symbiodinium* community in coral samples, we used a  
584 diversity measure ( ${}^qD_{ij}^Z(p)$ ) that incorporates OTU richness, evenness and  
585 sequence similarity [110]. Sequence similarity was calculated using  
586 pairwise percent similarities between OTU sequences using the ‘Ape’  
587 package with a “raw” model of molecular evolution. Heritability of  
588 *Symbiodinium* diversity associated with the 60 larvae was calculated using  
589 the package ‘MCMCglmm’ [111] utilizing the diversity metrics described  
590 above, where the coefficient of relatedness between individuals was set as a  
591 random effect. Models were run with  $1.5 \times 10^6$  iterations, a thinning of 50,  
592 and burn-in of 10% of the total iterations. A non-informative flat prior  
593 specification was used following an inverse gamma distribution [112].  
594 Assumptions of chain mixing, normality of posterior distributions, and  
595 autocorrelation were met. The posterior heritability was calculated by

dividing the model variance attributed to relatedness by the sum of additive and residual variance. Deviance Information Criterion was used to test if adding a maternal random effect had a statistically significant effect on heritability estimates.

600

# *Multiple ITS-2 copies and intragenomic variation*

Intragenomic variation within and between *Symbiodinium* types makes classifying type-level diversity in *Symbiodinium* based on sequence data difficult [99,113–115]. However, comparisons between single-cell and next-generation sequencing suggests that clustering across samples at 97% similarity sufficiently collapses intragenomic variants to the type level [99], as has been used in this study. Furthermore, a recent study suggests that clustering across samples at 97% identity underestimates diversity instead of overestimating it [109]. Intragenomic variation and generation of false-positives is therefore substantially minimized by using across-sample clustering at 97% similarity, as we have employed. Single cell sequencing is currently financially and logistically outside the scope of studies that examine communities of hundreds of different *Symbiodinium* types (as with coral juveniles), with a majority of these types not yet existing in culture. It is questionable if microsatellite flanking regions provide superior taxonomic resolution [116], and as no known single-copy marker exists, using other markers in tandem with ITS-2 will only result in data representing multiple, multi-copy markers. We addressed intragenomic variation by clustering across samples at 97% similarity and also provided two additional analyses

620 to test for their presence and potential impact on the heritability estimate;  
 621 and both confirm the robust nature of our conclusions in regards to this  
 622 issue. Overall, we undertook a three-step approach, as outlined in [95], to  
 623 assess if multiple copies and intragenomic variation of ITS-2 genes could  
 624 potentially bias abundance and heritability estimates across *Symbiodinium*  
 625 types after clustering at 97% identity. Briefly, OTUs were first divided by  
 626 clade and inspected for co-occurrence across samples using the tree function  
 627 in ‘Phyloseq’ and grouped into subsets of co-occurring OTUs. Secondly,  
 628 OTUs that increased proportionally and with high percent pairwise  
 629 similarity were inspected. Finally, pairwise percent identities were  
 630 calculated for these latter subsets of OTUs using the package ‘Ape’ [106],  
 631 and correlations of variance-normalized abundances were calculated for  
 632 pairs that had greater than 85% similarity with the function `ggpairs` in the  
 633 package ‘GGally’ [104]. The diversity metric was calculated taking into  
 634 account possible intragenomic variation by pooling the raw abundances of  
 635 potential intragenomic variants (OTUs: 8/10, 12/22/24, 28/223, 3/6,  
 636 588/848), and heritability was calculated using the parameters described  
 637 above. As we found little evidence of intragenomic variation amongst  
 638 OTUs, these results and their impact on heritability estimates are only  
 639 discussed in the Supporting Information.

640

#### 641 *Colony size and spatial distribution of adult S. hystrix (ShA) colonies*

642 To determine if *Symbiodinium* communities varied with colony size (as a  
 643 proxy for colony age), adult colonies were divided into five size classes

644 based on their mean diameter [49]: < 8 cm (n = 1 colony), 8 – < 14 cm (n =  
645 19), 14 – < 20 cm (n = 13), 20 – < 26 cm (n = 11), and 26 – 32 cm (n = 1).  
646 Differential abundance testing of *Symbiodinium* OTUs was among size  
647 classes was performed as for larval communities.

648

649 Sitepainter [117] and Inkscape [118] were used to test for spatial patterns in  
650 the distribution of *Symbiodinium* OTUs associated with the 45 adult  
651 colonies of *S. hystrix* (ShA) that were genotyped across the 16 m x 40 m  
652 sampling area. Gradient Boosted Models and linear models were run in the  
653 package ‘gbm’ [119] to examine spatial distributions of the ten most  
654 abundant OTUs. Linear models were checked for assumptions of linearity,  
655 normality, and homogeneity of variance. Square-root transformations were  
656 used to correct for issues of normality or heterogeneity. Latitude and  
657 longitude coordinates were centered before fitting models. The package  
658 ‘Spatstat’ [120] was used to visualize spatial variability in abundances of the  
659 three most significantly heterogeneous OTUs across the sampling area  
660 (OTUs: 1, 3, and 6). Spearman’s Rho rank correlation coefficients were  
661 calculated to test for competitive exclusion amongst the three OTUs that  
662 varied significantly across the sampling area. Pairwise p-values were  
663 generated for all OTU comparisons using the base ‘stats’ package in R.

664

## 665 **Acknowledgments**

666 This study was carried out with permission and in accordance with the  
667 recommendations from the Great Barrier Reef Marine Park Authority.

668

## 669 **References**

- 670 1. Lewis ZT, Totten SM, Smilowitz JT, Popovic M, Parker E, Lemay  
671 DG, et al. Maternal fucosyltransferase 2 status affects the gut  
672 bifidobacterial communities of breastfed infants. *Microbiome*.  
673 *BioMed Central*; 2015;3: 1.
- 674 2. Gilbert SF, Sapp J, Tauber AI. A symbiotic view of life: we have  
675 never been individuals. *Q Rev Biol. JSTOR*; 2012;87: 325–341.
- 676 3. Moya A, Peretó J, Gil R, Latorre A. Learning how to live together:  
677 genomic insights into prokaryote–animal symbioses. *Nat Rev Genet*.  
678 *Nature Publishing Group*; 2008;9: 218–229.
- 679 4. Goffredi SK, Johnson SB, Vrijenhoek RC. Genetic diversity and  
680 potential function of microbial symbionts associated with newly  
681 discovered species of *Osedax* polychaete worms. *Appl Environ*  
682 *Microbiol. Am Soc Microbiol*; 2007;73: 2314–2323.
- 683 5. Baumann P. Biology of bacteriocyte-associated endosymbionts of  
684 plant sap-sucking insects. *Annu Rev Microbiol. Annual Reviews*;  
685 2005;59: 155–189.
- 686 6. Oldroyd GED, Murray JD, Poole PS, Downie JA. The rules of  
687 engagement in the legume-rhizobial symbiosis. *Annu Rev Genet*.  
688 *Annual Reviews*; 2011;45: 119–144.
- 689 7. Brucker RM, Bordenstein SR. Speciation by symbiosis. *Trends Ecol*  
690 *Evol. Elsevier*; 2012;27: 443–451.
- 691 8. Douglas AE. Mycetocyte symbiosis in insects. *Biol Rev. Wiley*  
692 *Online Library*; 1989;64: 409–434.
- 693 9. Oliver KM, Smith AH, Russell JA. Defensive symbiosis in the real  
694 world—advancing ecological studies of heritable, protective bacteria  
695 in aphids and beyond. *Funct Ecol. Wiley Online Library*; 2014;28:  
696 341–355.
- 697 10. Thornhill DJ, Lewis AM, Wham DC, LaJeunesse TC. Host-specialist  
698 lineages dominate the adaptive radiation of reef coral endosymbionts.  
699 *Evolution (NY). Wiley Online Library*; 2014;68: 352–367.

- 700 11. Moran NA, McCutcheon JP, Nakabachi A. Genomics and evolution  
701 of heritable bacterial symbionts. *Annu Rev Genet. Annual Reviews*;  
702 2008;42: 165–190.
- 703 12. Russell JA, Funaro CF, Giraldo YM, Goldman-Huertas B, Suh D,  
704 Kronauer DJC, et al. A veritable menagerie of heritable bacteria from  
705 ants, butterflies, and beyond: broad molecular surveys and a  
706 systematic review. *PLoS One. Public Library of Science*; 2012;7:  
707 e51027.
- 708 13. Moran NA, Dunbar HE. Sexual acquisition of beneficial symbionts in  
709 aphids. *Proc Natl Acad Sci. National Acad Sciences*; 2006;103:  
710 12803–12806.
- 711 14. Baird AH, Guest JR, Willis BL. Systematic and biogeographical  
712 patterns in the reproductive biology of scleractinian corals. *Annu Rev*  
713 *Ecol Evol Syst.* 2009;40: 551–571.
- 714 15. Andersen SB, Hansen LH, Sapountzis P, Sørensen SJ, Boomsma JJ.  
715 Specificity and stability of the *Acromyrmex–Pseudonocardia*  
716 symbiosis. *Mol Ecol.* 2013;22: 4307–4321.
- 717 16. Scheuring I, Yu DW. How to assemble a beneficial microbiome in  
718 three easy steps. *Ecol Lett. Wiley Online Library*; 2012;15: 1300–  
719 1307.
- 720 17. Fujishima M, Fujita M. Infection and maintenance of *Holospira*  
721 *obtusa*, a macronucleus-specific bacterium of the ciliate *Paramecium*  
722 *caudatum*. *J Cell Sci.* 1985;76: 179–187.
- 723 18. Kaltz O, Koella JC, Poulin R. Host growth conditions regulate the  
724 plasticity of horizontal and vertical transmission in *Holospira*  
725 *undulata*, a bacterial parasite of the protozoan *Paramecium*  
726 *caudatum*. *Evolution (NY). BioOne*; 2003;57: 1535–1542.
- 727 19. Sandström JP, Russell JA, White JP, Moran NA. Independent origins  
728 and horizontal transfer of bacterial symbionts of aphids. *Mol Ecol.*  
729 *Wiley Online Library*; 2001;10: 217–228.
- 730 20. Byler KA, Carmi-Veal M, Fine M, Goulet TL. Multiple symbiont  
731 acquisition strategies as an adaptive mechanism in the coral

- 732       *Stylophora pistillata*. PLoS One. Public Library of Science; 2013;8:  
733       e59596.
- 734   21.   Padilla-Gamiño JL, Pochon X, Bird C, Concepcion GT, Gates RD.  
735       From parent to gamete: vertical transmission of *Symbiodinium*  
736       (Dinophyceae) ITS2 sequence assemblages in the reef building coral  
737       *Montipora capitata*. PLoS One. 2012;7: e38440.
- 738   22.   Quigley K, Willis B, Bay L. Heritability of the *Symbiodinium*  
739       community in vertically-and horizontally-transmitting broadcast  
740       spawning corals. bioRxiv. Cold Spring Harbor Labs Journals; 2017;  
741       100453.
- 742   23.   Baker AC. Flexibility and specificity in coral-algal symbiosis:  
743       Diversity, ecology, and biogeography of *Symbiodinium*. Annu Rev  
744       Ecol Evol Syst. 2003;34: 661–689.  
745       doi:10.1146/annurev.ecolsys.34.011802.132417
- 746   24.   Douglas AE. Host benefit and the evolution of specialization in  
747       symbiosis. Heredity (Edinb). 1998;81: 599–603.
- 748   25.   Fabina NS, Putnam HM, Franklin EC, Stat M, Gates RD.  
749       Transmission mode predicts specificity and interaction patterns in  
750       coral-*Symbiodinium* networks. PLoS One. 2012;7: e44970.
- 751   26.   Abrego D, van Oppen MJH, Willis BL. Highly infectious symbiont  
752       dominates initial uptake in coral juveniles. Mol Ecol. 2009;18: 3518–  
753       3531. doi:10.1111/j.1365-294X.2009.04275.x
- 754   27.   Abrego D, van Oppen MJH, Willis BL. Onset of algal endosymbiont  
755       specificity varies among closely related species of *Acropora* corals  
756       during early ontogeny. Mol Ecol. Wiley Online Library; 2009;18:  
757       3532–3543.
- 758   28.   Little AF, van Oppen MJH, Willis BL. Flexibility in algal  
759       endosymbioses shapes growth in reef corals. Science (80- ).  
760       2004;304: 1492–1494. doi:10.1126/science.1095733
- 761   29.   Poland DM, Coffroth MA. Trans-generational specificity within a  
762       cnidarian–algal symbiosis. Coral Reefs. 2017; 1–11.  
763       doi:10.1007/s00338-016-1514-0



- 764 30. Apprill A, Marlow HQ, Martindale MQ, Rappé MS. The onset of  
765 microbial associations in the coral *Pocillopora meandrina*. ISME J.  
766 Nature Publishing Group; 2009;3: 685–699.
- 767 31. Sharp KH, Distel D, Paul VJ. Diversity and dynamics of bacterial  
768 communities in early life stages of the Caribbean coral *Porites*  
769 *astreoides*. ISME J. Nature Publishing Group; 2012;6: 790–801.
- 770 32. Reynolds JM, Bruns BU, Fitt WK, Schmidt GW. Enhanced  
771 photoprotection pathways in symbiotic dinoflagellates of shallow-  
772 water corals and other cnidarians. Proc Natl Acad Sci U S A.  
773 2008;105: 13674–13678. doi:10.1073/pnas.0805187105
- 774 33. Cantin N, van Oppen M, Willis B, Mieog J, Negri A. Juvenile corals  
775 can acquire more carbon from high-performance algal symbionts.  
776 Coral Reefs. Springer Berlin / Heidelberg; 2009;28: 405–414.  
777 doi:10.1007/s00338-009-0478-8
- 778 34. Berkelmans R, van Oppen MJH. The role of zooxanthellae in the  
779 thermal tolerance of corals: a “nugget of hope” for coral reefs in an  
780 era of climate change. Proc R Soc B Biol Sci. 2006;273: 2305–2312.  
781 doi:10.1098/rspb.2006.3567
- 782 35. Hume BCC, D’Angelo C, Smith EG, Stevens JR, Burt J,  
783 Wiedenmann J. *Symbiodinium thermophilum* sp. nov., a  
784 thermotolerant symbiotic alga prevalent in corals of the world’s  
785 hottest sea, the Persian/Arabian Gulf. Sci Rep. Nature Publishing  
786 Group; 2015;5: 1–8.
- 787 36. LaJeunesse TC, Lee SY, Gil-Agudelo DL, Knowlton N, Jeong HJ.  
788 *Symbiodinium necroappetens* sp. nov. (Dinophyceae): an opportunist  
789 “zooxanthella” found in bleached and diseased tissues of Caribbean  
790 reef corals. Eur J Phycol. Taylor & Francis; 2015;50: 223–238.
- 791 37. Jones AM, Berkelmans R, van Oppen MJH, Mieog JC, Sinclair W. A  
792 community change in the algal endosymbionts of a scleractinian coral  
793 following a natural bleaching event: field evidence of acclimatization.  
794 Proc R Soc B Biol Sci. 2008;275: 1359–1365.  
795 doi:10.1098/rspb.2008.0069



- 796 38. Cunning R, Silverstein RN, Baker AC. Investigating the causes and  
797 consequences of symbiont shuffling in a multi-partner reef coral  
798 symbiosis under environmental change. *Proc R Soc B*. 2015;282:  
799 20141725.
- 800 39. Mateos M, Castrezana SJ, Nankivell BJ, Estes AM, Markow TA,  
801 Moran NA. Heritable endosymbionts of *Drosophila*. *Genetics*.  
802 *Genetics Soc America*; 2006;174: 363–376.
- 803 40. Cho J. The heritable immune system. *Nat Biotechnol*. Nature  
804 Publishing Group; 2015;33: 608–609.
- 805 41. Benson AK, Kelly SA, Legge R, Ma F, Low SJ, Kim J, et al.  
806 Individuality in gut microbiota composition is a complex polygenic  
807 trait shaped by multiple environmental and host genetic factors. *Proc*  
808 *Natl Acad Sci*. 2010;107: 18933–18938.
- 809 42. Campbell JH, Foster CM, Vishnivetskaya T, Campbell AG, Yang  
810 ZK, Wymore A, et al. Host genetic and environmental effects on  
811 mouse intestinal microbiota. *ISME J*. Nature Publishing Group;  
812 2012;6: 2033–2044.
- 813 43. Turnbaugh PJ, Quince C, Faith JJ, McHardy AC, Yatsunenko T,  
814 Niazi F, et al. Organismal, genetic, and transcriptional variation in the  
815 deeply sequenced gut microbiomes of identical twins. *Proc Natl Acad*  
816 *Sci*. National Acad Sciences; 2010;107: 7503–7508.
- 817 44. Ley RE, Peterson DA, Gordon JI. Ecological and evolutionary forces  
818 shaping microbial diversity in the human intestine. *Cell*. Elsevier;  
819 2006;124: 837–848.
- 820 45. Zoetendal EG, Akkermans ADL, Akkermans-van Vliet WM, de  
821 Visser JAGM, de Vos WM. The host genotype affects the bacterial  
822 community in the human gastrointestinal tract. *Microb Ecol Health*  
823 *Dis*. Taylor & Francis; 2001;13: 129–134.
- 824 46. Liu CM, Price LB, Hungate BA, Abraham AG, Larsen LA,  
825 Christensen K, et al. *Staphylococcus aureus* and the ecology of the  
826 nasal microbiome. *Sci Adv*. American Association for the  
827 Advancement of Science; 2015;1: e1400216.

- 828 47. Lynch M, Walsh B. Genetics and analysis of quantitative traits. 1998;
- 829 48. Visscher PM, Hill WG, Wray NR. Heritability in the genomics era—
- 830 concepts and misconceptions. *Nat Rev Genet.* 2008;9: 255–266.
- 831 49. Warner PA, Willis BL, van Oppen MJH. Sperm dispersal distances
- 832 estimated by parentage analysis in a brooding scleractinian coral. *Mol*
- 833 *Ecol.* 2016;25: 1398–1415.
- 834 50. Matz M V, Treml EA, Aglyamova G V, van Oppen MJH, Bay LK.
- 835 Adaptive pathways of coral populations on the Great Barrier Reef.
- 836 *bioRxiv. Cold Spring Harbor Labs Journals;* 2017; 114173.
- 837 51. Baums IB, Devlin-Durante MK, Polato NR, Xu D, Giri S, Altman
- 838 NS, et al. Genotypic variation influences reproductive success and
- 839 thermal stress tolerance in the reef building coral, *Acropora palmata*.
- 840 *Coral Reefs. Springer;* 2013;32: 703–717.
- 841 52. Dixon GB, Davies SW, Aglyamova G V, Meyer E, Bay LK, Matz M
- 842 V. Genomic determinants of coral heat tolerance across latitudes.
- 843 *Science (80- ).* 2015;348: 1460–1462. Available:
- 844 <http://science.sciencemag.org/content/348/6242/1460.abstract>
- 845 53. Meyer E, Davies S, Wang S, Willis BL, Abrego D, Juenger TE, et al.
- 846 Genetic variation in responses to a settlement cue and elevated
- 847 temperature in the reef-building coral *Acropora millepora*. *Mar Ecol*
- 848 *Prog Ser.* 2009;392: 81–92.
- 849 54. Kenkel CD, Traylor MR, Wiedenmann J, Salih A, Matz M V.
- 850 Fluorescence of coral larvae predicts their settlement response to
- 851 crustose coralline algae and reflects stress. *Proc R Soc B Biol Sci .*
- 852 2011; doi:10.1098/rspb.2010.2344
- 853 55. Kenkel CD, Setta SP, Matz M V. Heritable differences in fitness-
- 854 related traits among populations of the mustard hill coral, *Porites*
- 855 *astreoides*. *Heredity (Edinb). The Genetics Society;* 2015;115: 509–
- 856 516. Available: <http://dx.doi.org/10.1038/hdy.2015.52>
- 857 56. Levin RA, Beltran VH, Hill R, Kjelleberg S, McDougald D,
- 858 Steinberg PD, et al. Sex, scavengers, and chaperones: transcriptome
- 859 secrets of divergent *Symbiodinium* thermal tolerances. *Mol Biol Evol.*

860 SMBE; 2016; msw119.

861 57. Chakravarti LJ, Beltran VH, Oppen MJH. Rapid thermal adaptation  
862 in photosymbionts of reef-building corals. *Glob Chang Biol.* 2017;

863 58. Schmitt S, Angermeier H, Schiller R, Lindquist N, Hentschel U.  
864 Molecular microbial diversity survey of sponge reproductive stages  
865 and mechanistic insights into vertical transmission of microbial  
866 symbionts. *Appl Environ Microbiol. Am Soc Microbiol*; 2008;74:  
867 7694–7708.

868 59. Sherman CDH. Mating system variation in the hermaphroditic  
869 brooding coral, *Seriatopora hystrix*. *Heredity (Edinb). Nature*  
870 *Publishing Group*; 2008;100: 296–303.

871 60. Underwood JN, Smith LD, Van Oppen MJH, Gilmour JP. Multiple  
872 scales of genetic connectivity in a brooding coral on isolated reefs  
873 following catastrophic bleaching. *Mol Ecol. Wiley Online Library*;  
874 2007;16: 771–784.

875 61. van Oppen MJH, Lutz A, De’ath G, Peplow L, Kininmonth S.  
876 Genetic traces of recent long-distance dispersal in a predominantly  
877 self-recruiting coral. *PLoS One. Public Library of Science*; 2008;3:  
878 e3401.

879 62. Noreen AME, Harrison PL, van Oppen MJH. Genetic diversity and  
880 connectivity in a brooding reef coral at the limit of its distribution.  
881 *Proc R Soc London B Biol Sci. The Royal Society*; 2009;276: 3927–  
882 3935.

883 63. Xie J, Vilchez I, Mateos M. *Spiroplasma* bacteria enhance survival of  
884 *Drosophila hydei* attacked by the parasitic wasp *Leptopilina*  
885 *heterotoma*. *PLoS One. Public Library of Science*; 2010;5: e12149.

886 64. LaJeunesse TC. “Species” radiations of symbiotic dinoflagellates in  
887 the atlantic and Indo-Pacific since the Miocene-Pliocene Transition.  
888 *Mol Biol Evol.* 2005;22: 570–581. doi:10.1093/molbev/msi042

889 65. Sampayo EM, Ridgway T, Bongaerts P, Hoegh-Guldberg O.  
890 Bleaching susceptibility and mortality of corals are determined by  
891 fine-scale differences in symbiont type. *Proc Natl Acad Sci.*

- 2008;105: 10444–10449. doi:10.1073/pnas.0708049105
66. Maida M, Coll JC, Sammarco PW. Shedding new light on scleractinian coral recruitment. J Exp Mar Bio Ecol. Elsevier; 1994;180: 189–202.
67. Suzuki G, Yamashita H, Kai S, Hayashibara T, Suzuki K, Iehisa Y, et al. Early uptake of specific symbionts enhances the post-settlement survival of *Acropora* corals. Mar Ecol Prog Ser. Inter-Research; 2013;494: 149–158.
68. Gómez-Cabrera M del C, Ortiz JC, Loh WKW, Ward S, Hoegh-Guldberg O. Acquisition of symbiotic dinoflagellates (*Symbiodinium*) by juveniles of the coral *Acropora longicyathus*. Coral Reefs. Springer; 2008;27: 219–226.
69. Kemp DW, Fitt WK, Schmidt GW. A microsampling method for genotyping coral symbionts. Coral Reefs. 2008;27: 289–293. doi:10.1007/s00338-007-0333-8
70. Rowan R, Knowlton N, Baker A, Jara J. Landscape ecology of algal symbionts creates variation in episodes of coral bleaching. Nature. 1997;388: 265–269.
71. Lee MJ, Jeong HJ, Jang SH, Lee SY, Kang NS, Lee KH, et al. Most low-abundance “background” *Symbiodinium* spp. are transitory and have minimal functional significance for symbiotic corals. Microb Ecol. 2016; 1–13. doi:10.1007/s00248-015-0724-2
72. Bay LK, Cumbo VR, Abrego D, Kool JT, Ainsworth TD, Willis BL. Infection dynamics vary between *Symbiodinium* types and cell surface treatments during establishment of endosymbiosis with coral larvae. Diversity. 2011;3: 356–374. Available: <http://www.mdpi.com/1424-2818/3/3/356>
73. Franzenburg S, Walter J, Künzel S, Wang J, Baines JF, Bosch TCG, et al. Distinct antimicrobial peptide expression determines host species-specific bacterial associations. Proc Natl Acad Sci. National Acad Sciences; 2013;110: E3730–E3738.
74. Raina J-B, Tapiolas D, Motti CA, Foret S, Seemann T, Tebben J, et

- 924 al. Isolation of an antimicrobial compound produced by bacteria  
925 associated with reef-building corals. PeerJ. PeerJ Inc.; 2016;4: e2275.
- 926 75. Wood-Charlson EM, Hollingsworth LL, Krupp DA, Weis VM.  
927 Lectin/glycan interactions play a role in recognition in a  
928 coral/dinoflagellate symbiosis. Cell Microbiol. 2006;8: 1985–1993.
- 929 76. Davy SK, Allemand D, Weis VM. Cell biology of cnidarian-  
930 dinoflagellate symbiosis. Microbiol Mol Biol Rev. 2012;76: 229–  
931 261. doi:10.1128/mmbr.05014-11
- 932 77. Fraune S, Augustin R, Anton-Erxleben F, Wittlieb J, Gelhaus C,  
933 Klimovich VB, et al. In an early branching metazoan, bacterial  
934 colonization of the embryo is controlled by maternal antimicrobial  
935 peptides. Proc Natl Acad Sci. National Acad Sciences; 2010;107:  
936 18067–18072.
- 937 78. Frank U, Oren U, Loya Y, Rinkevich B. Alloimmune maturation in  
938 the coral *Stylophora pistillata* is achieved through three distinctive  
939 stages, 4 months post–metamorphosis. Proc R Soc London B Biol  
940 Sci. The Royal Society; 1997;264: 99–104.
- 941 79. Puill-Stephan E, Willis BL, Abrego D, Raina J-B, van Oppen MJH.  
942 Allorecognition maturation in the broadcast-spawning coral *Acropora*  
943 *millepora*. Coral Reefs. Springer; 2012;31: 1019–1028.
- 944 80. Coffroth MA, Santos S, Goulet T. Early ontogenetic expression of  
945 specificity in a cnidarian-algal symbiosis. Mar Ecol Prog Ser.  
946 2001;222: 85–96.
- 947 81. Poland DM, Mansfield JM, Hannes AR, Lewis CLF, Shearer TL,  
948 Connelly SJ, et al. Variation in *Symbiodinium* communities in  
949 juvenile *Briareum asbestinum* (Cnidaria: Octocorallia) over  
950 temporal and spatial scales. Mar Ecol Prog Ser. 2013;476: 23–37.
- 951 82. Littman RA, Willis BL, Bourne DG. Bacterial communities of  
952 juvenile corals infected with different *Symbiodinium* (dinoflagellate)  
953 clades. Mar Ecol Prog Ser. Inter-Research; 2009;389: 45–59.
- 954 83. Lema KA, Bourne DG, Willis BL. Onset and establishment of  
955 diazotrophs and other bacterial associates in the early life history

- stages of the coral *Acropora millepora*. Mol Ecol. Wiley Online Library; 2014;23: 4682–4695.
84. Nyholm S V, McFall-Ngai M. The winnowing: establishing the squid–*Vibrio* symbiosis. Nat Rev Microbiol. Nature Publishing Group; 2004;2: 632–642.
85. Babcock RC. Comparative demography of three species of scleractinian corals using age and size dependent classifications. Ecol Monogr. Wiley Online Library; 1991;61: 225–244.
86. Boulotte NM, Dalton SJ, Carroll AG, Harrison PL, Putnam HM, Peplow LM, et al. Exploring the *Symbiodinium* rare biosphere provides evidence for symbiont switching in reef-building corals. ISME J. Nature Publishing Group; 2016;
87. LaJeunesse TC, Smith RT, Finney J, Oxenford H. Outbreak and persistence of opportunistic symbiotic dinoflagellates during the 2005 Caribbean mass coral “bleaching” event. Proc R Soc B Biol Sci. 2009;276: 4139–4148. doi:10.1098/rspb.2009.1405
88. Baker AC, Starger CJ, McClanahan TR, Glynn PW. Coral reefs: Corals’ adaptive response to climate change. Nature. 2004;430: 741. doi:[http://www.nature.com/nature/journal/v430/n7001/supinfo/430741a\\_S1.html](http://www.nature.com/nature/journal/v430/n7001/supinfo/430741a_S1.html)
89. Wangpraseurt D, Larkum AWD, Ralph PJ, Kühl M. Light gradients and optical microniches in coral tissues. Frontiers in Microbiology. 2012. pp. 1–9. Available: [http://www.frontiersin.org/Journal/Abstract.aspx?s=53&name=aquatic\\_microbiology&ART\\_DOI=10.3389/fmicb.2012.00316](http://www.frontiersin.org/Journal/Abstract.aspx?s=53&name=aquatic_microbiology&ART_DOI=10.3389/fmicb.2012.00316)
90. Wangpraseurt D, Polerecky L, Larkum A, Ralph P, Nielsen D, Pernice M, et al. The *in-situ* light microenvironment of corals. Limnol Oceanogr. 2014;59: 917–926. doi:10.4319/lo.2014.59.3.0917
91. Ayre DJ, Resing JM. Sexual and asexual production of planulae in reef corals. Mar Biol. Springer; 1986;90: 187–190.
92. Warner PA, Oppen MJH, Willis BL. Unexpected cryptic species diversity in the widespread coral *Seriatopora hystrix* masks



- 988 spatial-genetic patterns of connectivity. *Mol Ecol.* 2015;24: 2993–  
989 3008.
- 990 93. Pochon X, Pawlowski J, Zaninetti L, Rowan R. High genetic  
991 diversity and relative specificity among *Symbiodinium*-like  
992 endosymbiotic dinoflagellates in soritid foraminiferans. *Mar Biol.*  
993 2001;139: 1069–1078. Available: <Go to  
994 ISI>://WOS:000173168700006
- 995 94. Edgar RC. UPARSE: highly accurate OTU sequences from microbial  
996 amplicon reads. *Nat Methods.* Nature Publishing Group; 2013;10:  
997 996–998.
- 998 95. Quigley KM, Willis BL, Bay LK. Maternal effects and *Symbiodinium*  
999 community composition drive differential patterns in juvenile  
1000 survival in the coral *Acropora tenuis*. *R Soc Open Sci.* 2016;3: 1–17.  
1001 Available:  
1002 <http://rsos.royalsocietypublishing.org/content/3/10/160471.abstract>
- 1003 96. Pochon X, Putnam H, Burki F, Gates R. Identifying and  
1004 characterizing alternative molecular markers for the symbiotic and  
1005 free-living dinoflagellate genus *Symbiodinium*. *PLoS One.* Public  
1006 Library of Science; 2012;7: e29816.  
1007 doi:10.1371/journal.pone.0029816
- 1008 97. Thomas L, Kendrick GA, Kennington WJ, Richards ZT, Stat M.  
1009 Exploring *Symbiodinium* diversity and host specificity in *Acropora*  
1010 corals from geographical extremes of Western Australia with 454  
1011 amplicon pyrosequencing. *Mol Ecol.* Wiley Online Library; 2014;23:  
1012 3113–3126.
- 1013 98. Green EA, Davies SW, Matz M V, Medina M. Quantifying cryptic  
1014 *Symbiodinium* diversity within *Orbicella faveolata* and *Orbicella*  
1015 *franksi* at the Flower Garden Banks, Gulf of Mexico. *PeerJ.* PeerJ  
1016 Inc.; 2014;2: e386.
- 1017 99. Arif C, Daniels C, Bayer T, Banguera Hinesroza E, Barbrook A,  
1018 Howe CJ, et al. Assessing *Symbiodinium* diversity in scleractinian  
1019 corals via Next Generation Sequencing based genotyping of the ITS2

- 1020 rDNA region. Mol Ecol. Wiley Online Library; 2014;23: 4418–4433.
- 1021 100. Ziegler M, Arif C, Burt JA, Dobretsov S, Roder C, LaJeunesse TC, et
- 1022 al. Biogeography and molecular diversity of coral symbionts in the
- 1023 genus *Symbiodinium* around the Arabian Peninsula. J Biogeogr.
- 1024 Wiley Online Library; 2017;
- 1025 101. Love MI, Huber W, Anders S. Moderated estimation of fold change
- 1026 and dispersion for RNA-seq data with DESeq2. Genome Biol.
- 1027 Springer; 2014;15: 1–21.
- 1028 102. McMurdie PJ, Holmes S. phyloseq: an R package for reproducible
- 1029 interactive analysis and graphics of microbiome census data. PLoS
- 1030 One. Public Library of Science; 2013;8: e61217.
- 1031 103. R Core Team. R: A language and environment for statistical
- 1032 computing. Vienna, Austria: R Foundation for Statistical Computing.
- 1033 Available: <http://www.R-project.org>; 2012.
- 1034 104. Schloerke B, Crowley J, Cook D, Hofmann H, Wickham H, Briatte F,
- 1035 et al. Ggally: Extension to ggplot2. R package version 0.5. 0. 2014.
- 1036 105. Wickham H. ggplot2: elegant graphics for data analysis. Springer
- 1037 Science & Business Media; 2009.
- 1038 106. Paradis E, Claude J, Strimmer K. APE: analyses of phylogenetics and
- 1039 evolution in R language. Bioinformatics. Oxford Univ Press;
- 1040 2004;20: 289–290.
- 1041 107. Love M, Anders S, Huber W. Differential analysis of count data—the
- 1042 DESeq2 package. Genome Biol. 2014;15: 550.
- 1043 108. Csardi G, Nepusz T. The igraph software package for complex
- 1044 network research. InterJournal, Complex Syst. 2006;1695: 1–9.
- 1045 109. Cunning R, Gates RD, Edmunds PJ. Using high-throughput
- 1046 sequencing of ITS2 to describe *Symbiodinium* metacommunities in
- 1047 St. John, US Virgin Islands. PeerJ Preprints; 2017.
- 1048 110. Leinster T, Cobbold CA. Measuring diversity: the importance of
- 1049 species similarity. Ecology. Eco Soc America; 2012;93: 477–489.
- 1050 111. Hadfield JD. MCMC methods for multi-response generalized linear
- 1051 mixed models: the MCMCglmm R package. J Stat Softw. 2010;33:



- 1052 1–22.
- 1053 112. Wilson AJ, Reale D, Clements MN, Morrissey MM, Postma E,  
1054 Walling CA, et al. An ecologist's guide to the animal model. J Anim  
1055 Ecol. Wiley Online Library; 2010;79: 13–26.
- 1056 113. Quigley KM, Davies SW, Kenkel CD, Willis BL, Matz M V, Bay  
1057 LK. Deep-sequencing method for quantifying background  
1058 abundances of *Symbiodinium* types: exploring the rare *Symbiodinium*  
1059 biosphere in reef-building corals. PLoS One. Public Library of  
1060 Science; 2014;9: e94297.
- 1061 114. Sampayo EM, Dove S, Lajeunesse TC. Cohesive molecular genetic  
1062 data delineate species diversity in the dinoflagellate genus  
1063 *Symbiodinium*. Mol Ecol. Blackwell Publishing Ltd; 2009;18: 500–  
1064 519. doi:10.1111/j.1365-294X.2008.04037.x
- 1065 115. Thornhill DJ, Lajeunesse TC, Santos SR. Measuring rDNA diversity  
1066 in eukaryotic microbial systems: how intragenomic variation,  
1067 pseudogenes, and PCR artifacts confound biodiversity estimates. Mol  
1068 Ecol. Blackwell Publishing Ltd; 2007;16: 5326–5340.  
1069 doi:10.1111/j.1365-294X.2007.03576.x
- 1070 116. Howells EJ, Willis BL, Bay LK, van Oppen MJH. Microsatellite  
1071 allele sizes alone are insufficient to delineate species boundaries in  
1072 *Symbiodinium*. Mol Ecol. 2016; n/a–n/a. doi:10.1111/mec.13631
- 1073 117. Gonzalez A, Stombaugh J, Lauber CL, Fierer N, Knight R.  
1074 SitePainter: a tool for exploring biogeographical patterns.  
1075 Bioinformatics. Oxford Univ Press; 2012;28: 436–438.
- 1076 118. Albert M, Andler J, Bah T, Barbry-Blot P, Barraud JF, Baxter B.  
1077 Inkscape. 2013.
- 1078 119. Ridgeway G. gbm: Generalized boosted regression models. R Packag  
1079 version. 2006;1.
- 1080 120. Baddeley A, Turner R. Spatstat: an R package for analyzing spatial  
1081 point patterns. J Stat Softw. 2005;12: 1–42.

## 1082 1083 Data Accessibility

1084 DNA sequences: All sequencing data will be made available through NCBI  
1085 SRA.

1086 **Author contributions**

1087 K.M.Q. and B.L.W. conceived of the experiment. K.M.Q. and P.A.W.  
1088 designed the sampling scheme and performed the experiment, collected and  
1089 analysed the data. L.K.B. provided reagents and materials. K.M.Q. wrote  
1090 and B.L.W., L.K.B., and P.A.W. edited and critically reviewed the  
1091 manuscript. All authors read and approved the final version.

1092

1093

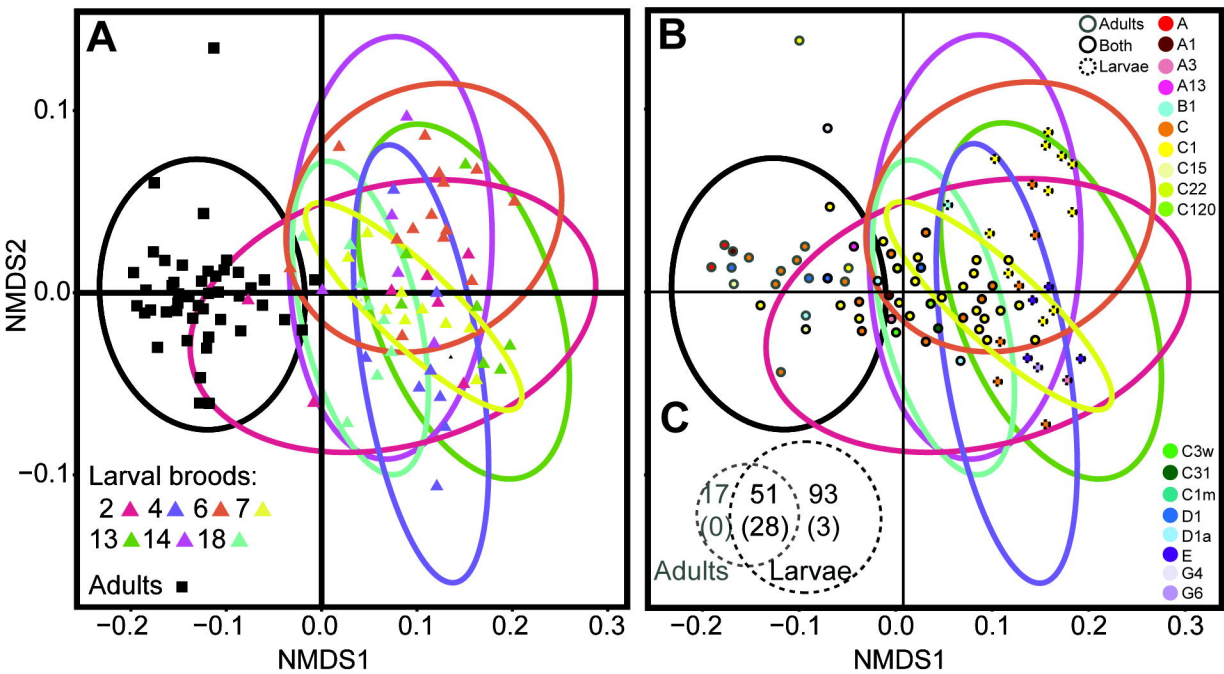

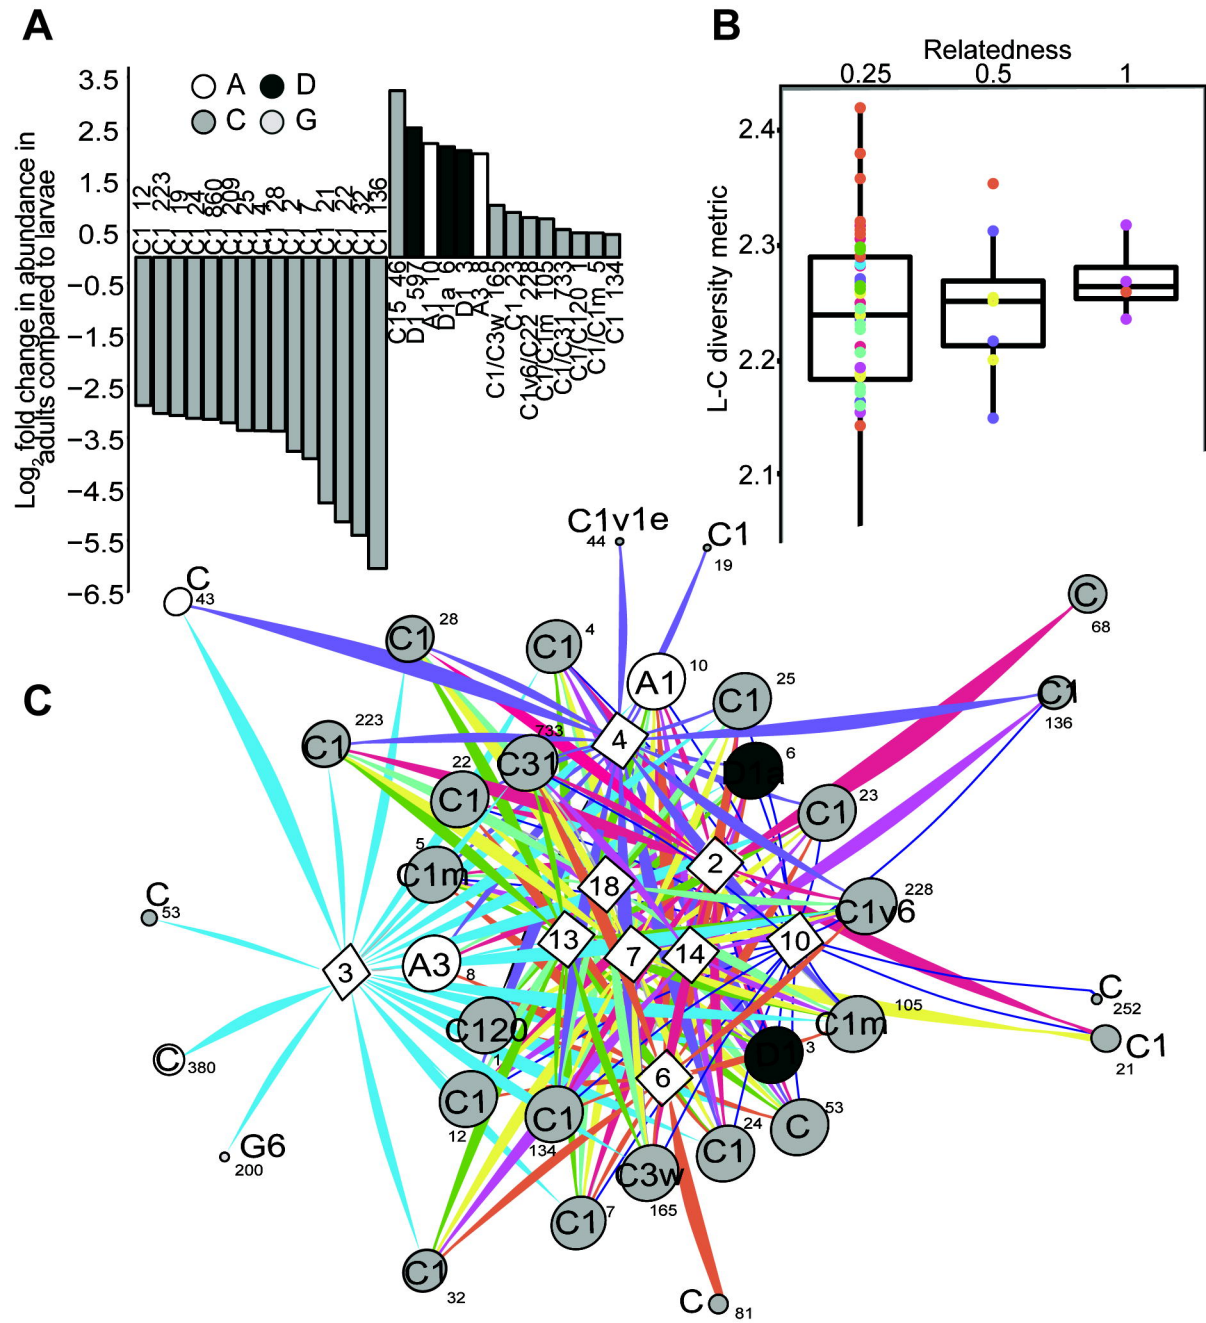

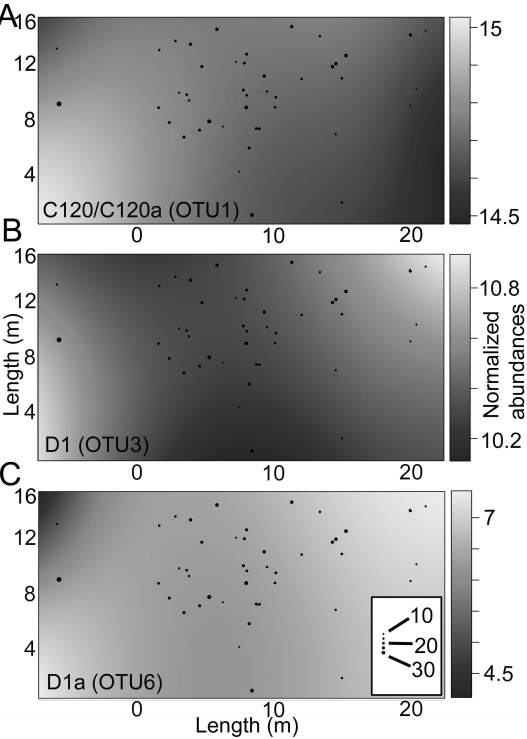

Source: http://www.biorxiv.org/content/10.1101/173591v1.full.pdf
